# Supplementary material for: The limits to growth – energetic burden of the endogenous antibiotic tropodithietic acid in Phaeobacter inhibens DSM 17395
Source: PLoS One. 2017 May 8;12(5):e0177295. doi: 10.1371/journal.pone.0177295 (PMC5421792; doi:10.1371/journal.pone.0177295)
Supplement: S1 Table — Analyzed were the concentrations of all amino acids present in casein hydrolysate (casamino acids) in the stationary growth phase via HPLC-FLD (see Experimental Procedures). Shown are the amino acids concentrations (mmol L-1) of each replicate and the calculated mean values with corresponding deviation. (XLSX) [file pone.0177295.s007.xlsx]

## Sheet: Tabelle1
strain	replicate	Asp	Glu	Ser	Gly	Thr	His	Ala	Arg	Tyr	Val	Met	Ile	Phe	Leu	Lys	Pro	SUM
medium	1	3.26239	9.1808	2.93108	1.46144	1.86872	0.717454	2.08074	0.881553	0.139181	2.13644	0.822339	1.29911	0.976998	2.48894	2.2639	5.49435	38.0055
	2	3.20608	8.9955	2.85501	1.41723	1.82215	0.682419	2.03629	0.837719	0.136199	2.08481	0.813168	1.25597	0.953414	2.41572	1.98742	5.70344	37.2025
	3	3.30235	9.03072	2.9329	1.49029	1.84308	0.695327	2.08517	0.880633	0.136966	2.12069	0.822571	1.27092	0.961684	2.47626	2.24607	5.83306	38.1287
	4	3.28467	8.95191	2.83378	1.40468	1.8097	0.683019	2.02486	0.856177	0.134633	2.07211	0.808972	1.23795	0.939043	2.38245	2.14133	5.76229	37.3276
	5	3.12434	8.48581	2.69781	1.35149	1.72059	0.713611	1.92586	0.821087	0.133352	1.94702	0.759547	1.17671	0.889822	2.27276	1.99334	5.21934	35.2325
	6	3.06477	8.29125	2.66118	1.30089	1.69698	0.651864	1.89255	0.804319	0.130979	1.91429	0.759776	1.1549	0.876126	2.21572	1.71823	6.14386	35.2777
	7	3.26958	8.95836	2.84605	1.41441	1.80785	0.725945	2.02444	0.873616	0.141518	2.04149	0.800438	1.23355	0.936281	2.3736	2.26232	5.55066	37.2601
	8	3.47198	9.38676	3.00213	1.45567	1.91817	0.750297	2.14033	0.924577	0.200194	2.16004	0.856197	1.30052	0.988096	2.50537	2.13625	6.75251	39.9491
	9	3.1395	8.4983	2.74073	1.37609	1.75127	0.698442	1.95126	0.851654	0.135855	1.98134	0.770798	1.19807	0.911032	2.30346	2.11936	5.31039	35.7375
	10	3.34804	9.14163	2.88738	1.45812	1.83825	0.727838	2.05608	0.896192	0.145659	2.09238	0.825511	1.26357	0.967546	2.43033	2.17112	6.1047	38.3543
	11	3.18193	8.62503	2.77487	1.39014	1.77277	0.696764	1.97756	0.861057	0.137034	2.00428	0.780208	1.21516	0.913719	2.32188	2.04254	5.22576	35.9207
	12	3.35874	9.15701	2.89275	1.45099	1.84772	0.727101	2.06156	0.894094	0.188614	2.09244	0.823251	1.26068	0.956433	2.40424	2.04794	5.92214	38.0857
	mean	3.2512	8.89192	2.83797	1.41429	1.8081	0.70584	2.02139	0.865223	0.146682	2.05394	0.803565	1.23893	0.939183	2.38256	2.09415	5.75187	37.2068
	deviation	0.109564	0.322858	0.097802	0.0515804	0.0606742	0.0254005	0.0691387	0.0323871	0.0217751	0.0739297	0.0288075	0.0437852	0.0335353	0.0860919	0.146743	0.426179	1.37073
DSM 17395	1	1.21529	0	1.59193	0	0.496138	0.484455	0	0.204069	0.0758043	1.13693	0.172886	0.721884	0.290308	0.995698	0.579587	0	7.96498
		1.29608	0	1.58565	0	0.494981	0.469713	0	0.207193	0.07801	1.15387	0.175648	0.72568	0.295077	0.99099	0.492279	0	7.96518
	2	0.73112	0	0.980608	0	0.153292	0.457422	0	0.126358	0.0457922	0.918116	0.128521	0.647306	0.188506	0.8879	0.4526	0	5.71754
		0.730825	0	0.969895	0	0.151464	0.434514	0	0.12538	0.0475194	0.900667	0.128978	0.629599	0.183868	0.872363	0.391892	0	5.56696
	3	0.928642	0	1.1872	0	0.29199	0.434857	0	0.154947	0.0591383	0.988734	0.14127	0.65554	0.231654	0.881988	0.46234	0	6.4183
		0.970247	0	1.24066	0	0.309206	0.452205	0	0.165963	0.0620193	1.03858	0.149819	0.684722	0.242783	0.917166	0.453823	0	6.68719
	4	0.477049	0	0.281292	0	0.0637012	0.408588	0	0.0801942	0.0299735	0.724924	0.0843169	0.574342	0.136633	0.749681	0.32529	0	3.93598
		0.486732	0	0.287014	0	0.0653133	0.421813	0	0.0850256	0.0316612	0.750906	0.0898684	0.595065	0.141639	0.772967	0.356458	0	4.08446
	mean	0.854499	0	1.01553	0	0.253261	0.445446	0	0.143641	0.0537398	0.951591	0.133913	0.654267	0.213808	0.883594	0.439283	0	6.04258
	deviation	0.285548	0	0.475732	0	0.163425	0.0235806	0	0.0452906	0.0170578	0.149826	0.0316642	0.0514186	0.0573541	0.0833267	0.0754274	0	1.43843
Δ262	1	0	0	0	0	0	0	0	0	0	0	0	0	0	0	0	0	0
	2	0.0927825	0	0	0	0	0	0	0.0872082	0	0.0105173	0	0	0	0	0.200186	0	0.390694
	3	0	0	0	0	0	0	0	0	0	0	0	0	0	0	0	0	0
	4	0.0962533	0	0	0	0	0.0462074	0	0.215443	0	0.03332	0	0.0884298	0	0.0346923	0.449538	0	0.963883
	mean	0.047259	0	0	0	0	0.0115519	0	0.0756627	0	0.0109593	0	0.0221075	0	0.00867308	0.162431	0	0.338644
	deviation	0.0472749	0	0	0	0	0.0200084	0	0.0882063	0	0.0136052	0	0.0382912	0	0.0150222	0.184813	0	0.394649
tdaA	1	0	0	0	0	0	0	0	0	0	0	0	0	0	0	0	0	0
	2	0	0	0	0	0	0	0	0	0	0	0	0	0	0	0	0	0
	3	0	0	0	0	0	0	0	0	0	0	0	0	0	0	0	0	0
	4	0	0	0	0	0	0	0	0	0	0	0	0	0	0	0	0	0
	mean	0	0	0	0	0	0	0	0	0	0	0	0	0	0	0	0	0
	deviation	0	0	0	0	0	0	0	0	0	0	0	0	0	0	0	0	0
tdaB	1	0	0	0	0	0	0	0	0	0	0	0	0	0	0	0	0	0
	2	0	0	0	0	0	0	0	0	0	0	0	0	0	0	0	0	0
	3	0	0	0	0	0	0	0	0	0	0	0	0	0	0	0	0	0
	4	0	0	0	0	0	0	0	0	0	0	0	0	0	0	0	0	0
	mean	0	0	0	0	0	0	0	0	0	0	0	0	0	0	0	0	0
	deviation	0	0	0	0	0	0	0	0	0	0	0	0	0	0	0	0	0
tdaC	1	0	0	0	0	0	0	0	0	0	0	0	0	0	0	0	0	0
	2	0	0	0	0	0	0	0	0	0	0	0	0	0	0	0	0	0
	3	0.0577785	0	0	0	0	0	0	0	0	0	0	0	0	0	0.0589085	0	0.116687
	4	0	0	0	0	0	0	0	0	0	0	0	0	0	0	0	0	0
	mean	0.0144446	0	0	0	0	0	0	0	0	0	0	0	0	0	0.0147271	0	0.0291717
	deviation	0.0250188	0	0	0	0	0	0	0	0	0	0	0	0	0	0.0255081	0	0.0505269
tdaE	1	0	0	0	0	0	0	0	0	0	0	0	0	0	0	0	0	0
	2	0	0	0	0	0	0	0	0	0	0	0	0	0	0	0	0	0
	3	0	0	0	0	0	0	0	0	0	0	0	0	0	0	0	0	0
	4	0	0	0	0	0	0	0	0	0	0	0	0	0	0	0	0	0
	mean	0	0	0	0	0	0	0	0	0	0	0	0	0	0	0	0	0
	deviation	0	0	0	0	0	0	0	0	0	0	0	0	0	0	0	0	0
