# Supplementary material for: The limits to growth – energetic burden of the endogenous antibiotic tropodithietic acid in Phaeobacter inhibens DSM 17395
Source: PLoS One. 2017 May 8;12(5):e0177295. doi: 10.1371/journal.pone.0177295 (PMC5421792; doi:10.1371/journal.pone.0177295)
Supplement: S2 Table — The table contains all chosen OD values with corresponding cell dry weight (CDW) values for the wild-type strain DSM 17395 and the mutant strains Δ262-kb and tdaE. Furthermore, it contains the corresponding dissolved oxygen saturation (DO) and oygen uptake rate (OUR) data as well as the OUR based on CDW. For detailed information on the oxygen uptake measurement see experimental procedures. (XLSX) [file pone.0177295.s008.xlsx]

## Sheet: Tabelle1
1/2 ODmax	DSM 17395					Δ262					tdaE
	1	2	3	mean	deviation	1	2	3	mean	deviation	1	2	3	mean	deviation
time [h]	17.8	17.6	17.2	17.5333	0.249444	12.3	12.6	12.7	12.5333	0.169967	15.1	16.2	16.4	15.9	0.571548
OD	1.5	1.5	1.5	1.5	0	2.2	2.2	2.2	2.2	0	2.2	2.2	2.2	2.2	0
CDW [g L-1]	0.7107	0.7107	0.7107	0.7107	0	1.29641	1.29641	1.29641	1.29641	0	1.10165	1.10165	1.10165	1.10165	0
growth rate [g L-1h-1]	0.093	0.093	0.105	0.097	0.00565685	0.37	0.37	0.36	0.366667	0.00471405	0.282	0.235	0.245	0.254	0.0202155
OUR [h-1]	822.33	786.146	717.517	775.331	43.4677	1277.4	1228.81	1380.84	1295.69	63.3994	956.04	1280	1316.06	1184.03	161.887
DO [%]	83.6	84.3	85.6	84.5	0.828654	74.6	75.6	72.5	74.2333	1.29185	81	74.5	73.8	76.4333	3.24174
OUR/CDW [L g-1 h-1]	1157.07	1106.16	1009.59	1090.94	61.1619	985.341	947.86	1065.13	999.445	48.904	867.824	1161.89	1194.62	1074.78	146.949
3/4 ODmax	DSM 17395					Δ262					tdaE
	1	2	3	mean	deviation	1	2	3	mean	deviation	1	2	3	mean	deviation
time [h]	21.4	21.2	20.2	20.9333	0.524934	13.9	14.3	14.4	14.2	0.216025	16.9	18.4	18.5	17.9333	0.731817
OD	2.25	2.25	2.25	2.25	0	3.3	3.3	3.3	3.3	4.44089e-16	3.3	3.3	3.3	3.3	4.44089e-16
CDW [g L-1]	1.01934	1.01934	1.01934	1.01934	0	1.94461	1.94461	1.94461	1.94461	0	1.65248	1.65248	1.65248	1.65248	0
growth rate [g L-1h-1]	0.073	0.071	0.094	0.0793333	0.010403	0.428	0.399	0.424	0.417	0.0128323	0.329	0.266	0.282	0.292333	0.0267374
OUR [h-1]	1051.2	1132.26	975.435	1052.97	64.0353	1971.63	2035.33	2002.4	2003.12	26.0096	1438.58	1978.6	1896.87	1771.35	237.66
DO [%]	79	75.8	80.7	78.5	2.03142	60.9	59.7	60	60.2	0.509902	71.3	60.6	62	64.6333	4.74857
OUR/CDW [L g-1 h-1]	1031.26	1110.77	956.927	1032.99	62.8202	1013.9	1046.65	1029.72	1030.09	13.3752	870.556	1197.35	1147.89	1071.93	143.82
shortly before reaching ODmax	DSM 17395					Δ262					tdaE
	1	2	3	mean	deviation	1	2	3	mean	deviation	1	2	3	mean	deviation
time [h]	26.4	27.1	23.4	25.6333	1.60485	14.9	15.4	15.3	15.2	0.216025	18	19.8	19.8	19.2	0.848528
OD	2.85	2.85	2.85	2.85	0	4	4	4	4	0	4	4	4	4	0
CDW [g L-1]	1.26626	1.26626	1.26626	1.26626	0	2.3571	2.3571	2.3571	2.3571	0	2.003	2.003	2.003	2.003	0
growth rate [g L-1h-1]	0.027	0.019	0.056	0.034	0.0158955	0.426	0.364	0.424	0.404667	0.0287673	0.324	0.252	0.272	0.282667	0.0303462
OUR [h-1]	1191.19	1287.61	914.02	1130.94	158.356	1705.09	2473.29	1897.5	2025.29	326.376	1765.5	2282.08	2188.26	2078.61	224.695
DO [%]	76.2	74.2	81.6	77.3333	3.12552	65.8	50.8	61.9	59.5	6.35453	65	54.5	56.4	58.6333	4.56825
OUR/CDW [L g-1 h-1]	940.72	1016.86	721.829	893.138	125.058	723.382	1049.29	805.014	859.23	138.465	881.424	1139.33	1092.49	1037.75	112.179
