# Supplementary material for: The limits to growth – energetic burden of the endogenous antibiotic tropodithietic acid in Phaeobacter inhibens DSM 17395
Source: PLoS One. 2017 May 8;12(5):e0177295. doi: 10.1371/journal.pone.0177295 (PMC5421792; doi:10.1371/journal.pone.0177295)
Supplement: S3 Table — Shown are the normalized peak areas of each replicate and the calculated mean values with corresponding standard error of all identified metabolites detected at least in one of the strains. nd: not detectable. (XLSX) [file pone.0177295.s009.xlsx]

## Sheet: DSM 17395
metabolite	1	2	3	4	5	6	7	8	9	10	mean	standard error
2,4-diaminobutanoate	205444	201856	219686	311702	218225	252336	324177	336737	230138	221238	252154	16413.1
2,6-diamino-pimelate	432438	264948	310826	335011	266453	264013	304672	337833	261590	274869	305265	16936.1
2-amino-2-deoxygalactose	116498	116403	105992	86591.2	82491.9	98025	86801.5	84299.7	124557	133744	103540	5873.15
2-amino-2-deoxy-gluconate	493486	372374	414036	322414	451696	487007	299025	330096	432235	422413	402478	21736.9
2-amino-2-deoxy-glucose	107460	79627.1	82485.4	76785.1	31761.3	61305.2	79025.9	67049.8	99615.8	91592.3	77670.8	6733.61
2-aminoadipic-acid	42870.5	52959.6	52977.8	56906.5	51784.2	58846.3	56729	61795.3	51181.3	56434	54248.5	1647.56
2-isopropylmalic acid	50894.6	52741.9	58130.7	26686.5	63531	53164.1	23825.8	21994.7	50905.4	61452.2	46332.7	5030.92
2-oxoglutarate	25495.3	23736.8	23762.2	33316	0	28393.4	32274.2	29256.2	33559.4	21288.4	25108.2	3103.75
3-aminoisobutanoate	28521.3	32007.1	33950.2	33179.1	34019.5	41188.8	31790.2	34433.3	40592.4	35683	34536.5	1223.97
3-hydroxybutanoate	45554.2	24798	14538.7	30516.2	16010.8	25970.3	40131.4	19234.9	22686.1	22508.3	26194.9	3168.62
3-hydroxy-decanoate	8750.64	14125.1	12678.7	14479.9	12749.5	17267.3	11673.5	16262.4	11816.5	13647.3	13345.1	766.815
3-phosphoglycerate	28084.2	40810.8	40551	41200.8	38063.5	42651.7	36376.1	54349.5	40714	38147.8	40094.9	2049.56
5-aminopentanoic-acid	7.16348e+06	8.05929e+06	7.25955e+06	2.59065e+06	8.54879e+06	7.69003e+06	3.3519e+06	9.04647e+06	7.51269e+06	8.17568e+06	6.93985e+06	688307
6-phospho-gluconate	9665.87	15221.8	16929.3	10995.8	17638.5	13938	95892.2	12492.5	13062.4	17363.8	22320	8219.01
adenine	78427.2	93735.9	89331.9	84186.2	83916.4	98728.3	70218.9	95954.9	72098	80102.8	84670.1	3084.79
alanine	7.64939e+06	5.64966e+06	7.53856e+06	1.03415e+07	7.41458e+06	9.95444e+06	1.16733e+07	7.5855e+06	8.16578e+06	5.58962e+06	8.15623e+06	621498
AMP	1.09848e+06	1.22182e+06	1.0927e+06	984290	1.15229e+06	1.12079e+06	938237	599340	1.12788e+06	1.16742e+06	1.05032e+06	56659.4
arginine	13236.6	19752.7	19335.5	23070.4	20790.5	22414.4	19401.9	24118.8	17207.5	20003.6	19933.2	984.339
asparagine	17874.2	26728.6	24806.6	20619.6	25796.1	23922.3	21815.7	26476.6	21114.3	27138.2	23629.2	988.743
aspartate	1.31569e+07	9.72259e+06	1.24e+07	1.48138e+07	1.14189e+07	1.24847e+07	1.55123e+07	9.16982e+06	1.14293e+07	1.13511e+07	1.21459e+07	632938
beta-Alanine	36933.3	36285.9	41429.5	40095	42900.7	45401.8	44856.8	38434.5	43530.1	43296	41316.4	1026.76
cadaverine	444777	387082	399691	453241	469186	438124	632243	462956	477119	512532	467695	21584.9
citrate	152056	140615	132072	146965	123740	161079	129821	143625	151710	140890	142257	3604.76
cysteine	15415.9	16268.5	19692.4	20518	17326.4	21266.6	17957.5	18363.6	17434	18596.4	18283.9	577.435
cysteinyl-glycine	115750	68561.4	33802.9	52482.5	56929	41557.7	46422.6	54417.4	88612.2	59997.9	61853.4	7654.71
cytosine	76469.4	95236.9	57951.8	57401.6	53089.3	53193.5	40781.5	47175.4	54415.4	52871.8	58858.7	4967.34
D200302_2009.31	0	0	0	0	0	0	0	0	0	0	0	0
ethanolamine	28436.3	30261	20089.7	30398.3	19988	39589.2	51240.6	58401.9	32748.2	21193.4	33234.7	4124.98
fructose-1,6-bisphosphate	12105.3	21131.7	19759.7	16868.7	13117.4	17590.1	11080.6	18924.3	17106.3	20420.9	16810.5	1126.36
fumarate	91640.4	103556	91237.6	97368.7	116651	117020	108402	90959	90734	101292	100886	3274.78
glucose	4917.11	8184.21	6151.36	5807.52	9637.19	8359.3	6622.09	10033.1	7463.71	8062.76	7523.83	523.114
glucose-6-phosphate	11152.3	16422.1	15853	11454.6	18231.2	18570.3	11743.3	15684.8	16321.4	15273.8	15070.7	857.374
glutamate	8.60588e+07	1.03498e+08	9.66395e+07	1.11142e+08	1.08495e+08	1.08793e+08	1.145e+08	1.2035e+08	1.03535e+08	1.05208e+08	1.05822e+08	3.01211e+06
glutamine	2.00999e+06	1.9793e+06	2.43872e+06	1.61408e+06	2.27166e+06	1.58551e+06	1.50468e+06	1.81938e+06	1.8803e+06	2.49467e+06	1.95983e+06	110975
glycerol-3-phosphate	202330	179508	137510	247148	148302	226176	343417	341910	195742	178451	220049	22871.8
glycerophosphoglycerol	139998	89764.6	65788.8	138005	59699.1	126064	192374	152421	123960	80221.3	116830	13348.7
glycine	732023	596682	645466	1.08185e+06	884219	767941	1.52788e+06	853197	820006	825709	873497	84135.2
guanine	15042.9	20695.3	15655.9	12474.2	16308	16148.7	14773.3	22600.3	19485.8	17682.5	17086.7	965.343
guanosine-5-monophosphate	63199.1	71078.3	62589.4	55582.7	65190.8	60027	53857.6	36289.2	61778.7	67754.1	59734.7	3070.73
homoserine	82177.7	58209.8	55105	57412.4	58179.1	59962.4	56651.6	46885.2	64128.8	63845.7	60255.8	2874.06
isoleucine	1.02361e+06	787068	893171	721417	1.0293e+06	842464	754914	578387	903101	845875	837931	43320.6
leucine	1.0429e+06	844317	920644	739257	1.12055e+06	861375	792345	579233	903247	912276	871614	47900.8
lysine	208242	158075	186000	142366	157151	161559	130294	128425	180472	172061	162464	7966.39
malate	187238	150499	159390	158984	175851	170118	184323	104858	145776	176681	161372	7660.3
methionine	283892	216994	236184	193123	258337	172167	181893	132933	246531	244298	216635	14547.7
N-acetyl-glutamate	48458.1	45262.1	49255.7	47491.1	54118	50218.5	47983.9	56164.7	41840.2	50363.6	49115.6	1289.45
N-acetyl-ornithine	58570.5	46887.8	47332.7	48425.4	54226.3	45543.2	39563.8	57186.2	59616.9	47663.9	50501.7	2072.13
N-acetyl-serine	91633.3	69162.9	74268.6	91340.6	73624.3	57361.7	76193.2	59330.9	67253.2	72464.7	73263.3	3612.51
Nicotinamide	329298	287850	310354	244726	286889	274285	211103	134059	296031	303851	267845	18297.3
ornithine	188129	187834	207552	202360	155282	171223	138904	223615	168553	166519	180997	8143.53
phenylalanine	905702	883460	895306	942052	1.11093e+06	1.03952e+06	1.18192e+06	1.12239e+06	1.07801e+06	1.02268e+06	1.0182e+06	33668.4
phosphate-monomethyl ester	42008.8	43854.2	41298.8	47238.7	45708.6	54459.4	48955.4	59050	49566.8	41225.9	47336.6	1863.4
pipecolate	792908	577501	646338	877058	750582	803445	956279	613664	776296	613603	740767	39570.6
proline	1.40322e+06	1.12178e+06	1.16244e+06	1.14027e+06	1.93286e+06	1.45615e+06	1.79451e+06	783710	1.42827e+06	1.52014e+06	1.37434e+06	107109
putrescine	24740.7	28179.4	29648.6	25963.7	23536.2	28322	25413.5	31435.4	24727.4	28017.5	26998.5	793.861
pyroglutamate	2.00428e+07	1.76807e+07	1.73766e+07	2.06814e+07	2.07734e+07	2.19949e+07	2.05889e+07	1.33706e+07	1.77396e+07	1.83733e+07	1.88622e+07	791702
serine	95945.5	74414	79419.2	80351	90872.3	78485.6	78197.4	74054.7	82884.6	84554.3	81917.9	2204.29
threonine	328477	295357	349479	326761	310737	297840	333482	298082	354420	333441	322807	6765.53
thymine	38980.3	39981.1	43733	40288.8	38896.9	46200.9	34461.1	37038.7	39178.6	38522.7	39728.2	1034.38
tyrosine	2.14485e+06	1.40289e+06	1.67213e+06	4.24876e+06	1.83685e+06	2.39558e+06	4.0503e+06	4.5764e+06	2.50759e+06	1.50882e+06	2.63442e+06	380652
uric acid	13731.4	18191.7	15611.1	9298.72	23128.1	17278.2	10185.5	16000.5	12836.8	14608.5	15087.1	1268.72
uridine 5'-monophosphate	112489	145631	122493	122427	130122	82579	92771.2	76039.8	114183	145542	114428	7657.88
valine	6.9643e+06	5.18595e+06	6.198e+06	6.91107e+06	6.55743e+06	6.61011e+06	6.40072e+06	5.03557e+06	6.13584e+06	5.07268e+06	6.10717e+06	235679
xanthine	14475.6	16463.6	12603.1	11165	19357	12824	12121.5	16345.6	13652.9	13194.9	14220.3	786.536

## Sheet: D262
metabolite	1	2	3	4	5	6	7	8	9	10	11	12	mean	standard error
2,4-diaminobutanoate	358072	312337	331205	254128	386471	341544	312716	252644	350675	314365	248605	251356	309510	13736.3
2,6-diamino-pimelate	223989	250928	159771	180728	204562	159458	153244	187075	207702	256559	197756	181079	196904	9802.12
2-amino-2-deoxygalactose	483960	569963	511591	546470	507683	502341	571600	466008	565867	419589	410951	635792	203021	4475.21
2-amino-2-deoxy-gluconate	230442	195730	210793	189957	211270	193512	213104	206035	214047	197382	168675	205301	362939	18509.4
2-amino-2-deoxy-glucose	310898	428017	365128	387307	369307	379570	411153	287752	388801	316097	240693	470546	515985	19049.4
2-aminoadipic-acid	0	0	0	0	0	0	0	0	0	0	0	0	0	0
2-isopropylmalic acid	10373.8	12091.3	14056.6	10919.9	9579.16	11361.9	14527.5	11099.8	13260.4	9923.46	9407.53	11133	11477.9	489.412
2-oxoglutarate	57207.1	36506.7	29509.4	29304.7	23558.1	18267.3	48943.9	35952.1	25004.3	24292.8	33579.7	31267.6	32782.8	3181.1
3-aminoisobutanoate	309452	223911	302598	277653	304082	247184	323008	166691	304070	198063	452149	264133	281083	20969.1
3-hydroxybutanoate	11837.6	0	16675.7	14848.7	14190	18690.8	20033	22532	16541.4	12842	11901.7	19356.1	25351.5	619.762
3-hydroxy-decanoate	21873.7	24250.6	27679.2	24726.6	27330.9	23690.2	24805.5	29575.6	25052.9	26593	23093.4	25546.2	14954.1	1673.67
3-phosphoglycerate	56323.1	55367.4	37723.9	48711.2	46842	31066.7	27454.1	67063.7	38159.4	51885.8	21776	40116.8	1.90228e+07	1.32046e+06
5-aminopentanoic-acid	3.08743e+07	1.78701e+07	1.42189e+07	15114905	1.97745e+07	2.20368e+07	1.75036e+07	1.63055e+07	2.31884e+07	1.59344e+07	1.7263e+07	1.81895e+07	10713.8	460.394
6-phospho-gluconate	8622.03	10556.7	11547.8	12542.4	10950.3	10519.2	12669.6	11350.2	9411.19	11758.4	7253.02	11385.2	77088.8	2406.76
adenine	71967.2	72358.7	78737	77192.4	78917.8	78360.8	66487.3	96406.4	67257.1	87536.4	76864.6	72979.6	1.00622e+07	404863
alanine	9.20479e+06	1.06396e+07	1.29078e+07	1.0768e+07	8.57589e+06	9.91708e+06	1.09275e+07	8.20201e+06	1.04333e+07	8.88184e+06	8.73224e+06	1.15568e+07	1.13394e+06	45232.2
AMP	1.41046e+06	1.06259e+06	1.19273e+06	1.13754e+06	1.08159e+06	1.11343e+06	1.17862e+06	1.34029e+06	827174	1.18966e+06	933779	1.13937e+06	38442.5	1063.47
arginine	29681.5	37302.1	41239.7	39297	42053.2	39825.3	35682.8	41361.3	35111.2	39945.5	42547.1	37263.7	43090	1731.81
asparagine	37134.6	53628.3	38152.4	43168.2	45738	42468.5	33580.8	44930.5	38746.1	50801.2	48958.2	39772.8	3.64425e+07	1.68696e+06
aspartate	3.71158e+07	3.9271e+07	4.36896e+07	3.51239e+07	4.15669e+07	3.63853e+07	3.71735e+07	2.78818e+07	4.46187e+07	3.3189e+07	2.48055e+07	3.64884e+07	86713	3893.08
beta-Alanine	107660	92232	106632	97037.9	70677.1	63259.7	90570	87836.1	84926.4	83618.3	73475	82632.4	2.46135e+06	378880
cadaverine	3.29007e+06	1.08425e+06	4.45959e+06	1.64984e+06	2.70667e+06	4.53479e+06	3.69064e+06	1.75679e+06	2.87733e+06	1.05358e+06	1.00188e+06	1.43073e+06	48409	3097.22
citrate	55353.4	46849	54940.2	55617	58946.9	42641.3	35720	63614.4	41574.6	52348.3	25566.8	47735.6	7437.56	1669.18
cysteine	10809.4	10555.7	0	0	13680.5	6333.94	11514.8	13495	11505.6	0	0	11355.8	194544	17816.1
cysteinyl-glycine	273990	157404	279992	109955	129708	187705	251213	242162	195398	97592.8	219107	190307	117086	9051.76
cytosine	116506	100368	162823	125578	94308.6	103582	176431	115916	99236.3	99777.1	64949.8	145560	38613.5	3257.83
D200302_2009.31	27359.4	25667.7	27825.9	24728.3	29697.2	27146.3	27072	28541.6	24023.3	31266.3	34122.9	25029.2	44947.8	2703.52
ethanolamine	47877.3	44476.4	43462	46650.7	40285.8	22596.3	38954	59918.6	32254.5	33095.4	18716.1	35074.9	66499.3	1903.99
fructose-1,6-bisphosphate	47948.6	58174.5	37857	34421.7	42445.7	31710.8	45926.7	52011.8	50402.3	61467.3	37576.4	39430.4	59334.2	5464.92
fumarate	62055.5	64661.2	66817.6	74361.6	80619.2	59055.5	68149.1	66100.3	61443.5	62870.1	58984.9	72872.7	7943.15	463.853
glucose	6811.01	8696.18	7770.97	7924.96	6761.4	6882.52	9516.77	10671.7	8311.37	7981.68	4530.59	9458.74	25705.7	1188.83
glucose-6-phosphate	27066.1	27082.8	26061.8	24549.4	26344.2	21096.1	32311.9	27743.4	26809.1	25787.7	15472	28143.9	1.48703e+08	1.62135e+07
glutamate	1.91874e+08	2.16092e+08	9.10913e+07	1.32537e+08	1.88183e+08	9.31634e+07	9.61569e+07	9.02494e+07	1.20108e+08	2.01259e+08	1.1816e+08	2.45556e+08	2.10288e+06	187550
glutamine	1.95311e+06	3.04409e+06	1.6496e+06	1.92504e+06	1.83178e+06	1.67346e+06	2.28031e+06	2.03897e+06	2.33469e+06	3.57799e+06	1.18433e+06	1.74119e+06	43540.8	3820.27
glycerol-3-phosphate	127398	113933	103259	100898	113885	75654.6	62287.3	127092	92506	124322	42847	88508.8	97715.9	7727.13
glycerophosphoglycerol	78269.5	78799.9	57937	70448.2	66280	41175.2	32151.7	80511.1	60002.4	63145.2	20750.5	62539.7	1.51781e+06	131981
glycine	1.24051e+06	2.07164e+06	1.54004e+06	1.87006e+06	1.37149e+06	1.16463e+06	960201	1.08468e+06	958481	1.90101e+06	2.3181e+06	1.73289e+06	18611.3	1437.77
guanine	20895.1	13510.8	27209.8	17577.3	15586.7	19117.6	20624	25705.8	14161.3	16468.4	10442.8	22035.9	83735.9	3468.07
guanosine-5-monophosphate	101836	70964.8	98578.2	87861.3	73441.5	91211	90853.3	94211.2	74841.5	78061.4	63551.2	79419.1	58223.7	2462.11
homoserine	72445.6	65126.4	56529.4	55696.2	49951.1	42783.9	63672.2	51606.5	66476.6	50673.5	59723.9	63998.6	1.07877e+06	48519.8
isoleucine	1.0391e+06	1.19307e+06	1.38568e+06	1.22639e+06	922848	1.02191e+06	1.1032e+06	845412	913508	925357	1.074e+06	1.29478e+06	505499	32326
leucine	370335	551946	723605	623767	486012	502686	382054	435465	445788	454633	430454	659239	427381	27369.7
lysine	536783	336199	510436	337832	507328	487004	544750	355777	494517	341089	279043	397811	114531	6569.39
malate	124398	111261	117421	147100	128999	82789.2	129482	99170.2	97605.2	78987.3	107382	149777	255968	19119.1
methionine	379755	304064	200214	209689	235781	147574	254511	191046	330727	239078	310281	268889	40704.5	1369.6
N-acetyl-glutamate	39977.2	33184	46577.8	36804	39090.9	43787.8	43878	45636.2	32479.8	44807.8	43293.2	38937.1	91952.3	4707.27
N-acetyl-ornithine	112682	78028.2	85449.5	78049.2	87914.4	99232.7	118313	96826.4	112327	64907.1	80959.3	88737.9	0	0
N-acetyl-serine	0	0	0	0	0	0	0	0	0	0	0	0	187416	11621.2
Nicotinamide	235262	235750	152024	161879	154086	129107	142907	210689	178795	195041	203924	249532	286106	8587.13
ornithine	311432	306348	279875	253632	279046	293042	291349	301639	333264	303225	224515	255909	341332	67049
phenylalanine	116825	529860	50537.2	326930	222338	108018	64652.7	540416	409295	451244	788390	487473	73068.3	3470.69
phosphate-monomethyl ester	94518.4	81996.7	70106.5	82809.2	62971.1	55900.8	70968.2	83240.2	76448.5	61553.5	56980.6	79326.2	2.0212e+06	120250
pipecolate	2.18637e+06	1.72863e+06	2.87566e+06	2.17078e+06	1.72999e+06	2.20159e+06	2.41709e+06	1.72011e+06	2.0662e+06	1.39568e+06	1.53036e+06	2.23193e+06	3.89341e+06	251955
proline	4.14498e+06	3.5899e+06	4.91315e+06	5.48538e+06	3.93804e+06	4.17608e+06	3.2144e+06	3.07468e+06	2.91012e+06	2.71131e+06	3.66041e+06	4.90243e+06	52206.5	2096.82
putrescine	61004.3	57435.7	50019.6	52499.8	44907.2	50443.7	55283.8	60797.3	55255.8	56615.3	35817	46398.6	4.84192e+07	1.73003e+06
pyroglutamate	5.34632e+07	5.73245e+07	5.41882e+07	5.17287e+07	4.805e+07	4.39205e+07	4.97179e+07	4.44128e+07	4.97582e+07	4.43795e+07	3.46756e+07	4.9411e+07	358430	13605.1
serine	420117	387445	388533	343106	326299	297293	400878	295941	412324	292481	349443	387299	469758	21666.2
threonine	508634	602127	456821	488625	363398	338014	459258	410261	474568	471530	566075	497779	40604	1447.78
thymine	36569.8	40213.9	44933.5	40867.7	36686.5	36383.5	44855.5	48334.3	39644	42745.9	30542	45471.7	470655	44017.3
tyrosine	490423	628310	306762	484732	428172	310346	261853	542963	351846	758813	641413	442224	0	0
uric acid	0	0	0	0	0	0	0	0	0	0	0	0	210233	13709.5
uridine 5'-monophosphate	171341	185812	182727	205264	199489	211499	279946	270233	175905	291558	135796	213232	1.03396e+07	701634
valine	1.018e+07	9.60468e+06	1.67061e+07	9.80396e+06	9.50369e+06	1.12871e+07	1.23701e+07	7.35811e+06	9.86375e+06	7.52364e+06	9.4325e+06	1.04419e+07	7497.58	343.343
xanthine	5550.88	7637.24	7764.8	6816.02	8100.24	7234.82	8134.13	8934.96	7648.99	9276.61	5238.01	7634.19	27706.7	839.891

## Sheet: tdaE
metabolite	1	2	3	4	5	6	7	8	9	10	11	12	mean	standard error
2,4-diaminobutanoate	255104	227428	241073	230408	212491	232190	245049	222020	229465	245161	236105	232038	234044	3298.75
2,6-diamino-pimelate	167449	134450	147480	160584	173331	180026	181529	197081	190974	180746	144122	182719	170041	5661.43
2-amino-2-deoxygalactose	311500	214971	249732	222299	210086	209400	219718	206936	211853	256903	249246	255490	234845	8947.25
2-amino-2-deoxy-gluconate	134211	103792	130577	107479	115866	142121	145433	127077	122454	125163	133034	129355	126380	3628.86
2-amino-2-deoxy-glucose	229402	133328	178726	144528	143621	129108	156934	139306	141846	168654	167663	185286	159867	8202.37
2-aminoadipic-acid	18218.5	22772.4	30880.7	28101.8	21835.3	26111.4	30756	27333.9	22165.9	26192.5	28326	21231.6	25327.2	1162.6
2-isopropylmalic acid	1109.75	11047.1	0	9090.43	6327.06	9838.17	0	0	6215.44	0	7466.84	0	4257.9	1289.69
2-oxoglutarate	35104.7	40344.3	39412.9	36232.2	49667.3	41223.5	51766.4	46832.4	0	44874.3	46609.4	50891.3	40246.5	3992.46
3-aminoisobutanoate	40872.7	36765.2	44657.3	35621.9	50106.8	55256.1	45755.2	35980.4	35820.7	47900.5	47687.5	50869.5	43941.2	1959.82
3-hydroxybutanoate	15889.2	23008.1	20580	21920.6	20268.9	21334.8	29781.9	21724.7	18214	16494.4	17369.3	22680.8	20772.2	1076.32
3-hydroxy-decanoate	7085.11	21048.2	17474.2	20302.8	16361.9	18007.1	15846	16253	16108.5	16497	17240.1	15132.1	16446.3	992.597
3-phosphoglycerate	33986.2	75293.2	57839.9	61751.8	64596	36591.8	37599.1	46759.4	56932	60923	43834.1	64003	53342.5	3814.11
5-aminopentanoic-acid	2.88882e+06	1.19973e+07	2.42568e+06	6.83141e+06	6.54806e+06	5.43125e+06	3.7665e+06	3.14483e+06	3.10186e+06	4.30853e+06	3.80671e+06	5.65585e+06	4.99223e+06	763170
6-phospho-gluconate	2818.82	16897.1	13788.9	13539.6	11081.9	12962.4	9203.17	9620.64	11751	10520.4	9644.13	9896.27	10977	987.685
adenine	53848.3	72531.5	79133.5	77536.6	79364.9	82192.1	84124.7	75969.8	76217.2	60185.6	60138.3	68893.4	72511.3	2802.56
alanine	5.65973e+06	4.61284e+06	5.91813e+06	4.06359e+06	5.08833e+06	4.62813e+06	6.02198e+06	4.80505e+06	5.00435e+06	4.83309e+06	5.77111e+06	5.24588e+06	5.13768e+06	173837
AMP	985941	925708	912052	611619	986708	891215	1.07137e+06	1.15661e+06	1.12319e+06	874016	964095	1.09725e+06	966648	42137
arginine	13809.4	28439.8	21804.8	24374.2	26486	24014.4	25868.7	24216.8	26214	23045.1	20621.7	24131.8	23585.6	1078.09
asparagine	12842.6	21618.3	21651.6	22433.2	19680.5	22400.5	20250.4	19949.1	20183.2	22295.6	20017.6	24961.8	20690.4	837.695
aspartate	1.75025e+07	8.21318e+06	9.82702e+06	8.7234e+06	1.11433e+07	1.13713e+07	1.49033e+07	1.23336e+07	1.77182e+07	1.71957e+07	1.32033e+07	1.24767e+07	1.28843e+07	960311
beta-Alanine	62438.5	47823	54032.3	52535.6	64148	74143.6	62054.2	58238.9	61032.3	73317.3	58048.1	71653.9	61622.1	2394.1
cadaverine	545000	709658	488567	429417	484110	410655	480946	382662	358939	358450	461536	524661	469550	28117.2
citrate	57356	84934.5	74760.2	72085.2	86633.7	46551	54699.5	59348.6	67715.2	62563.9	63222.5	69045.3	66576.3	3427.51
cysteine	4987.94	11176.4	9043.66	10922.7	12304.8	11263.5	12113.2	10329	13315.6	0	10334.2	0	8815.91	1331.53
cysteinyl-glycine	142203	130393	109668	103436	120355	130589	139336	121017	226152	96143.8	109287	152716	131775	9858.09
cytosine	59232.4	47663.2	58111.6	39621.8	61391.2	55937.7	68346.5	62005.2	68615.3	57365.8	55388.8	57512.2	57599.3	2308.09
D200302_2009.31	0	0	0	0	0	0	0	0	0	0	0	0	0	0
ethanolamine	26660.6	48528.2	30715.6	40878.3	42655.1	35913.6	34472.6	49111.3	46732	47433.3	28046.1	66742.8	41490.8	3264.75
fructose-1,6-bisphosphate	14455.3	37059.5	32559.3	32804.8	38219.9	35244.3	36539	32301.8	29105	27957.6	29685.4	31919.9	31487.6	1807.42
fumarate	50348.3	56935.1	48592.7	51990.8	64486.5	61606.2	62411	67919.6	66477.3	62882.8	48841	70599	59424.2	2254.98
glucose	1045.7	9197.6	0	10863.4	0	9837.44	7960.29	6588.89	7431.74	6621.25	6968.78	5194.14	5975.77	1077.86
glucose-6-phosphate	9309.73	29929	19383.4	26462.9	19765.1	26385.1	19035.9	21201.5	20804.6	22879.2	20242.7	23448.5	21570.6	1480.94
glutamate	1.24424e+08	1.47741e+08	1.52664e+08	1.40569e+08	1.40938e+08	1.42919e+08	1.53616e+08	1.40379e+08	1.40807e+08	147942407	1.57615e+08	1.46034e+08	1.44637e+08	2.47799e+06
glutamine	5.23618e+06	5.01095e+06	5.40831e+06	4.58263e+06	4.36074e+06	3.82973e+06	4.85241e+06	3.96069e+06	4.45851e+06	4.96575e+06	4.26783e+06	4.81975e+06	4.64612e+06	141345
glycerol-3-phosphate	148800	192753	193549	164446	184577	119979	162090	196423	178833	203283	156277	220841	176821	7990.75
glycerophosphoglycerol	72097.5	82334	99785.9	73796.3	98630.1	63908.7	84069.5	112698	103563	115548	76003	127810	92520.4	5792.6
glycine	1.5984e+06	1.54307e+06	1.25652e+06	987895	1.23878e+06	1.03276e+06	1.0529e+06	957292	1.09648e+06	1.30896e+06	1.24035e+06	1.52343e+06	1.2364e+06	64405.2
guanine	5082.81	20549.6	16275.9	18980.4	21247.8	21806.3	18585.1	18955.4	23539.8	14021.2	14357.4	17507.9	17575.8	1407.37
guanosine-5-monophosphate	55776.6	68946.1	58962.4	45041.6	66931.4	53258.5	65713.2	16664.9	67987.8	55583.7	72725.9	82266.8	59154.9	4814.17
homoserine	38356.6	36311.8	38811.6	36464.8	45386.4	48485.1	51454.5	23700.1	44833.4	46179.3	43680.5	43788.8	41454.4	2118.06
isoleucine	268141	266841	282309	219679	197293	201247	230821	208228	204912	210942	259430	228599	231537	8641.98
leucine	192018	237984	219035	116750	153200	109838	119537	117186	104646	116544	216694	124812	152354	14354.4
lysine	197979	251438	197611	177705	244434	190838	200280	193679	164954	206855	167473	237400	202554	8213.48
malate	116828	81880	76457.1	68724.1	90150.6	94906	113864	120902	110402	122648	94624.3	127721	101592	5696.93
methionine	158948	127748	145427	115846	134255	166242	128497	152764	107422	145561	135771	138622	138092	4929.25
N-acetyl-glutamate	36144	43141.4	48364.9	46712.8	39298	48764.3	48427.8	50081.6	42152.7	40017.8	43136	38590.1	43736	1344.77
N-acetyl-ornithine	89261.5	85541.8	102108	80522.4	87750.4	104945	102931	93373.3	70220.8	77235.9	91879.9	82092.7	88988.5	3103.97
N-acetyl-serine	0	0	0	0	0	0	0	0	0	0	0	0	0	0
Nicotinamide	248555	151724	171165	144221	216188	207512	234179	221740	240928	63732.2	223662	192091	192975	15291.2
ornithine	268804	231231	286637	265075	275996	299025	334059	331802	247754	264031	214801	279401	274885	10293.6
phenylalanine	382426	1.06865e+06	1.08199e+06	833495	798658	719777	924277	787365	463170	439810	745772	840842	757186	66002
phosphate-monomethyl ester	48614.8	64545	51793.7	54500.7	62671.2	50649.3	56180.1	54868.8	57593.8	52376.5	52441.3	60368	55550.3	1422.05
pipecolate	464805	216725	382320	283002	248599	373314	467865	411218	382470	363180	413279	260028	355567	24292.5
proline	2.31615e+06	2.14866e+06	1.79185e+06	1.21656e+06	1.70384e+06	1.12804e+06	1.38064e+06	1.40408e+06	1.17574e+06	1.17387e+06	1.7693e+06	2.08659e+06	1.60794e+06	121357
putrescine	97603.3	101491	91254	96057.7	82753.2	111433	98749.8	102530	92597.7	94370.5	67063.9	99716.2	94635	3212.27
pyroglutamate	3.42376e+07	1.953e+07	2.01267e+07	1.67577e+07	2.53562e+07	2.54564e+07	3.22123e+07	2.53692e+07	3.35534e+07	2.79675e+07	2.53155e+07	2.4966e+07	2.5904e+07	1.58518e+06
serine	133542	142835	125403	124861	137460	133103	138591	129224	137636	139068	136417	148559	135558	1984.69
threonine	270446	203085	207589	169075	226767	232212	261334	218079	214846	234918	231726	230531	225051	7626.14
thymine	27944	29496.9	31307.7	28586.7	36627.6	37451.8	37120.5	34673.3	35509.7	31933	34799.1	33388.8	33236.6	965.644
tyrosine	495695	624973	787368	615791	653971	598396	752504	657452	602993	573110	683781	546808	632737	23685.6
uric acid	1119.44	4857.24	6608.56	7798.8	10182.7	10297.1	9975.17	9635.96	9473.42	9286.98	6746.47	10697.1	8056.58	818.575
uridine 5'-monophosphate	165276	61022.6	89502.2	49106.6	110496	62622.7	133582	138275	115590	96539.2	125546	142124	107474	10514.2
valine	2.16528e+06	1.47876e+06	2.05888e+06	1.38585e+06	1.36262e+06	1.61856e+06	2.14378e+06	1.74675e+06	1.67492e+06	1.41367e+06	1.86156e+06	1.36137e+06	1.68933e+06	88528.3
xanthine	1444.19	13150.2	10376.4	10730.4	10235.3	11104.2	10552.3	118185	9349.95	7540.17	8840.81	12297	18650.5	9088.99
