# Supplementary material for: The limits to growth – energetic burden of the endogenous antibiotic tropodithietic acid in Phaeobacter inhibens DSM 17395
Source: PLoS One. 2017 May 8;12(5):e0177295. doi: 10.1371/journal.pone.0177295 (PMC5421792; doi:10.1371/journal.pone.0177295)
Supplement: S4 Table — Shown are all identified metabolites detected at least in one of the strains. Fold changes are calculated between the indicated strains (strain A/strain B in the column heading) including corresponding standard error. nd: metabolite not detectable in strain A; +: metabolite detectable in strain A but not in strain B; -: metabolite neither detectable in strain A nor in strain B. (XLSX) [file pone.0177295.s010.xlsx]

## Sheet: Tabelle1
metabolite	tdaE/WT		Δ262/WT		tdaE/Δ262
	fold change	standard error	fold change	standard error	fold change	standard error
2,4-diaminobutanoate	0.928181	0.061817	1.22746	0.096702	0.756178	0.0352116
2,6-diamino-pimelate	0.557027	0.0360416	0.645026	0.0480801	0.863572	0.0517185
2-amino-2-deoxygalactose	2.26814	0.154983	4.98342	0.337275	0.455139	0.0241459
2-amino-2-deoxy-gluconate	0.314005	0.0192065	0.504427	0.0294247	0.622498	0.022534
2-amino-2-deoxy-glucose	2.05826	0.207347	4.67279	0.469999	0.440478	0.031865
2-aminoadipic-acid	0.466874	0.0256971	nd		+
2-isopropylmalic acid	0.0918984	0.02957	0.247727	0.0288985	0.370966	0.113471
2-oxoglutarate	1.60293	0.254059	1.30566	0.205187	1.22767	0.170362
3-aminoisobutanoate	1.27231	0.0724795	8.13872	0.672187	0.156328	0.0135876
3-hydroxybutanoate	0.792988	0.104352	0.570878	0.0940795	1.38907	0.171318
3-hydroxy-decanoate	1.23239	0.102698	1.89968	0.118625	0.648732	0.0422435
3-phosphoglycerate	1.3304	0.116936	1.08594	0.110272	1.22511	0.138665
5-aminopentanoic-acid	0.719357	0.131086	2.7411	0.331836	0.262434	0.0440608
6-phospho-gluconate	0.491802	0.186427	0.48001	0.177956	1.02457	0.102162
adenine	0.856399	0.0454874	0.910461	0.043684	0.940621	0.0467342
alanine	0.629909	0.0525178	1.23369	0.106307	0.510591	0.0268426
AMP	0.920332	0.0638301	1.0796	0.0724318	0.852472	0.0503704
arginine	1.18323	0.0796197	1.92857	0.109162	0.613528	0.0327803
asparagine	0.875626	0.0509833	1.82359	0.105803	0.480167	0.0273926
aspartate	1.06079	0.0964726	3.00039	0.209134	0.353552	0.0310202
beta-Alanine	1.49147	0.0687859	2.09876	0.107698	0.710645	0.0421927
cadaverine	1.00397	0.0759023	5.26271	0.845728	0.19077	0.0315093
citrate	0.468	0.0268541	0.340292	0.0234174	1.37529	0.112941
cysteine	0.482167	0.0744003	0.406781	0.0921915	1.18532	0.320649
cysteinyl-glycine	2.13044	0.308083	3.14525	0.484228	0.677351	0.0800971
cytosine	0.978604	0.0914257	1.98928	0.227675	0.491939	0.0428363
D200302	-		+		nd
ethanolamine	1.24842	0.183465	1.16184	0.174367	1.07452	0.123965
fructose-1,6-bisphosphate	1.87309	0.165261	2.67379	0.240749	0.700538	0.0582445
fumarate	0.589023	0.0294138	0.659152	0.0285303	0.893607	0.0424794
glucose	0.794245	0.153534	1.05573	0.0958581	0.752317	0.142631
glucose-6-phosphate	1.4313	0.127619	1.70568	0.125055	0.839138	0.0694632
glutamate	1.3668	0.0454082	1.40522	0.15835	0.972662	0.107354
glutamine	2.37068	0.152387	1.07299	0.113356	2.20941	0.2082
glycerol-3-phosphate	0.803551	0.0910732	0.444063	0.0579951	1.80954	0.164812
glycerophosphoglycerol	0.791925	0.103177	0.507869	0.0745339	1.55931	0.173659
glycine	1.41546	0.154998	1.73763	0.225481	0.814597	0.0825704
guanine	1.02862	0.100804	1.08923	0.104247	0.944362	0.105074
guanosine-5-monophosphate	0.990294	0.0953242	1.4018	0.0925392	0.706446	0.0645093
homoserine	0.687974	0.0480876	0.966275	0.061594	0.711986	0.0472212
isoleucine	0.27632	0.0176195	1.28742	0.0882214	0.21463	0.0125445
leucine	0.174795	0.0190656	0.579957	0.0489012	0.301393	0.0343196
lysine	1.24676	0.0793302	2.63061	0.212178	0.473943	0.0359242
malate	0.629554	0.0462538	0.709734	0.0528427	0.887028	0.071154
methionine	0.637441	0.0484776	1.18156	0.118678	0.539491	0.0446615
N-acetyl-glutamate	0.89047	0.0360024	0.828749	0.0353691	1.07448	0.0489749
N-acetyl-ornithine	1.76209	0.0948946	1.82078	0.119455	0.967769	0.0599496
N-acetyl-serine	nd		nd		-
Nicotinamide	0.720473	0.0753768	0.699721	0.0645552	1.02966	0.103601
ornithine	1.51873	0.0889019	1.58072	0.0854931	0.960778	0.0461083
phenylalanine	0.743655	0.0693299	0.335232	0.0667772	2.21833	0.476731
phosphate-monomethyl ester	1.17352	0.0551041	1.54359	0.0952252	0.760251	0.0410219
pipecolate	0.479998	0.0416278	2.72852	0.218164	0.175919	0.0159371
proline	1.16998	0.126931	2.83294	0.286976	0.412991	0.0410589
putrescine	3.5052	0.157413	1.93369	0.0962527	1.8127	0.0953235
pyroglutamate	1.37333	0.101909	2.56699	0.141497	0.534995	0.0379107
serine	1.65481	0.0506929	4.37548	0.203581	0.3782	0.0153864
threonine	0.697167	0.0277779	1.45523	0.0737226	0.479078	0.0274187
thymine	0.8366	0.0326381	1.02204	0.0451236	0.818555	0.0376488
tyrosine	0.240181	0.0358499	0.178656	0.0307499	1.34438	0.135428
uric acid	0.534006	0.0704299	nd		nd
uridine 5'-monophosphate	0.939228	0.111327	1.83726	0.171675	0.511211	0.0601042
valine	0.276615	0.0180022	1.69303	0.132165	0.163385	0.0140083
xanthine	1.31154	0.643259	0.527244	0.0378602	2.48754	1.2176
