# Supplementary material for: The limits to growth – energetic burden of the endogenous antibiotic tropodithietic acid in Phaeobacter inhibens DSM 17395
Source: PLOS journal article supplement (doi:10.1371/journal.pone.0177295), 2017-05-08

TDA biosynthetic gene cluster of *P. inhibens* DSM 17395

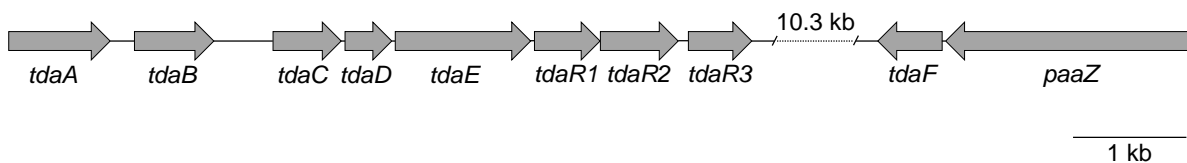

| Gene           | Predicted gene products                  |
|----------------|------------------------------------------|
| <i>tdaA</i>    | Transcriptional regulator, LysR family   |
| <i>tdaB</i>    | Putative beta etherase                   |
| <i>tdaC</i>    | Prephenate dehydratase TdaC-like protein |
| <i>tdaD</i>    | Thioesterase superfamily protein         |
| <i>tdaE</i>    | Acyl-CoA dehydrogenase                   |
| <i>tdaR1</i> * | Uncharacterized protein                  |
| <i>tdaR2</i> * | Uncharacterized protein                  |
| <i>tdaR3</i> * | Gamma-glutamylcyclotransferase           |
| <i>tdaF</i>    | Putative flavoprotein, HFCD family       |
| <i>paaZ</i>    | Phenylacetic acid degradation protein    |

\*Wilson et al. (2016)

Proposed biosynthesis pathway of TDA by Brock et al. (2014)

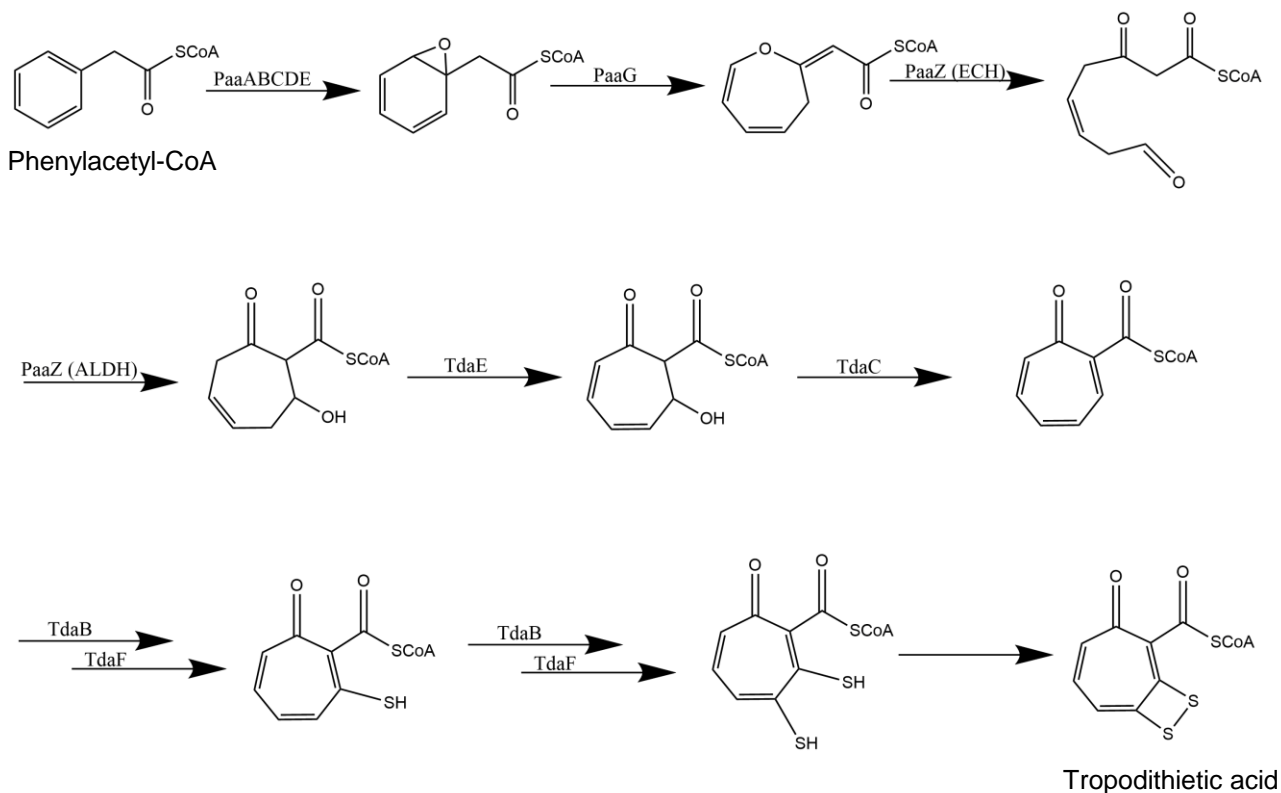

Supplement: S5 (10.1371/journal.pone.0177295.s005) [file journal.pone.0177295.s005]
