# Supplementary material for: The limits to growth – energetic burden of the endogenous antibiotic tropodithietic acid in Phaeobacter inhibens DSM 17395
Source: PLoS One. 2017 May 8;12(5):e0177295. doi: 10.1371/journal.pone.0177295 (PMC5421792; doi:10.1371/journal.pone.0177295)
Supplement: S5 Table — Analyzed were the concentrations of all amino acids present in casein hydrolysate (casamino acids) at ½ ODmax via HPLC-FLD (see Experimental Procedures). Shown are the amino acids concentrations (mmol L-1) of each replicate and the calculated mean values with corresponding deviation. (XLSX) [file pone.0177295.s011.xlsx]

## Sheet: Tabelle1
strain	replicate	Asp	Glu	Ser	Gly	Thr	His	Ala	Arg	Tyr	Val	Met	Ile	Phe	Leu	Lys	Pro	SUM
medium	1	3.65457	10.5433	3.108	1.42143	1.47527	0.610159	2.19703	0.729936	0.167299	2.19363	0.950688	1.2606	1.05799	2.16111	1.90929	5.9071	39.3474
	2	3.38851	9.75552	2.88096	1.37754	1.38159	0.566999	2.06191	0.697955	0.156014	2.03735	0.880596	1.16893	0.990383	1.98506	1.71487	5.60874	36.6529
	3	3.12067	9.03123	2.66812	1.278	1.2214	0.486431	1.92033	0.623297	0.142465	1.86665	0.812925	1.06957	0.888632	1.84448	1.75547	5.5028	34.2324
	4	3.31531	9.65805	2.84513	1.37884	1.20399	0.491989	2.06219	0.676863	0.153717	1.9943	0.873634	1.14709	0.959691	1.97296	1.83598	5.60874	36.1785
	mean	3.36977	9.74703	2.87555	1.36395	1.32056	0.538895	2.06037	0.682013	0.154874	2.02298	0.879461	1.16154	0.974174	1.9909	1.8039	5.65684	36.6028
	deviation	0.191364	0.537226	0.156538	0.0526734	0.113006	0.0520122	0.097844	0.0388101	0.00881773	0.116822	0.0488253	0.0680712	0.0608592	0.112658	0.0748445	0.15082	1.8258
WT	1	2.08906	2.95425	2.34784	0.428551	1.454	0.740381	0.971038	0.405651	0.160656	1.63137	0.445247	0.92583	0.566433	1.18867	1.09276	1.31483	18.7166
	2	2.06983	2.95477	2.31795	0.443527	1.43247	0.710284	0.991653	0.3905	0.15251	1.60531	0.438534	0.906183	0.545908	1.17002	1.10871	1.38895	18.6271
	3	1.97102	3.42535	2.38234	0.467616	1.068	0.733256	1.07917	0.373016	0.133187	1.56948	0.443478	0.910693	0.491194	1.22086	1.05578	1.43174	18.7562
	4	2.08463	3.15225	2.35209	0.446569	1.27901	0.700997	1.00441	0.397179	0.148802	1.60212	0.438488	0.905359	0.538962	1.17707	1.13099	1.315	18.6739
	mean	2.05363	3.12166	2.35006	0.446566	1.30837	0.72123	1.01157	0.391586	0.148789	1.60207	0.441437	0.912016	0.535624	1.18916	1.09706	1.36263	18.6935
	deviation	0.0482288	0.193029	0.0228162	0.0139363	0.154311	0.0161289	0.0408051	0.011991	0.0099762	0.0219718	0.00299215	0.00822959	0.0275684	0.01948	0.0274292	0.0500543	0.0481003
∆262	1	1.6111	6.54593	2.02458	0.162264	0.276959	0.646463	0.46417	0.578075	0.0324864	1.272	0.474472	0.843205	0.168169	1.11757	1.60817	2.52335	20.349
	2	1.42337	6.18948	1.86921	0.10811	0.0981189	0.623974	0.307117	0.553618	0.0218883	1.06005	0.426423	0.789422	0.0688855	1.02933	1.46951	2.25195	18.2904
	mean	1.51723	6.3677	1.94689	0.135187	0.187539	0.635218	0.385643	0.565846	0.0271874	1.16602	0.450447	0.816314	0.118527	1.07345	1.53884	2.38765	19.3197
	deviation	0.0938673	0.178227	0.0776857	0.0270771	0.0894202	0.0112446	0.0785264	0.0122284	0.00529903	0.105975	0.0240248	0.0268911	0.0496418	0.0441188	0.0693305	0.135701	1.02926
tdaE	1	2.11809	5.927	2.23053	0.447356	0.612709	0.619493	0.964294	0.489802	0.0543318	1.42606	0.5158	0.90258	0.272729	1.25473	1.34983	2.93567	22.121
	2	2.0786	5.92659	2.25631	0.449534	0.57607	0.598562	0.985141	0.490966	0.0540796	1.4403	0.521177	0.908397	0.265152	1.26313	1.35997	2.68594	21.8599
	3	2.03871	6.1438	2.18927	0.397175	0.545127	0.570135	0.905091	0.489988	0.0521102	1.40272	0.512628	0.895927	0.260668	1.25465	1.39268	2.57623	21.6269
	4	2.1726	6.42968	2.2483	0.501654	0.680145	0.56147	1.04599	0.506577	0.0646884	1.5063	0.544	0.94367	0.327623	1.32045	1.41549	2.71935	22.988
	mean	2.102	6.10677	2.2311	0.44893	0.603512	0.587415	0.975128	0.494333	0.0563025	1.44385	0.523401	0.912644	0.281543	1.27324	1.37949	2.7293	22.1489
	deviation	0.0494859	0.206412	0.025892	0.0369504	0.0502968	0.0230488	0.0503576	0.00708284	0.00491739	0.0384707	0.0122789	0.0184486	0.0269512	0.0274768	0.0261286	0.130379	0.514975
