# Supplementary material for: The limits to growth – energetic burden of the endogenous antibiotic tropodithietic acid in Phaeobacter inhibens DSM 17395
Source: PLoS One. 2017 May 8;12(5):e0177295. doi: 10.1371/journal.pone.0177295 (PMC5421792; doi:10.1371/journal.pone.0177295)
Supplement: S6 Table — Shown are blastp hits against the genome of Rhizobium meliloti 1021 with corresponding E-values and identities. Furthermore, the sequences were analyzed with InterPro to predict domains. (XLSX) [file pone.0177295.s012.xlsx]

## Sheet: Tabelle1
locus tag	blastp	E-value	identity	InterPro
PGA1_262p00050	Succinoglycan biosynthesis protein ExoO	8.1e-35	0.328	nucleotide-diphospho-sugar transferase: glycosyltransferase 2-like (domain)
	Succinoglycan biosynthesis protein ExoU	1.9e-22	0.344
PGA1_262p00060	Succinoglycan biosynthesis protein ExoO	6.8e-31	0.3
	Succinoglycan biosynthesis protein ExoU	7.5e-26	0.293
PGA1_262p00070	Exopolysaccharide production protein ExoQ	8.4e-16	0.287	O-antigen ligase-related (family)
PGA1_262p00080	-	-	-	p-loop containing nucleoside triphosphate hydrolase (domain)
PGA1_262p00090	Succinoglycan biosynthesis transport protein ExoP	1e-46	0.237	Lipopolysaccharide biosynthesis, tyrosine kinase (G-rich), P-loop containing nucleoside triphosohate hydrolase: AAA: Exopolysaccharide synthesis protein
PGA1_262p00100	Succinoglycan biosynthesis protein ExoA	2.6e-71	0.44	nucleotide-diphospho-sugar transferase: glycosyltransferase 2-like (domain)
PGA1_262p00110	Succinoglycan biosynthesis protein ExoM	7e-61	0.402
PGA1_262p00120	Succinoglycan biosynthesis protein ExoL	1.2e-43	0.328	UDP-Glycosyltransferase/glycogen phosphorylase superfamily (unintegrated)
PGA1_262p00130	-	-	-
